# Supplementary material
Source: publisher figshare collection journal article supplement (https://tandf.figshare.com/ndownloader/files/14617175)
Supplement: Supplementary file 1 [file 14617175]

**Table S1.** ICD-9-CM diagnostic codes used in this study

| ICD-9-CM section (codes)                                                          | Code       | Diagnosis                                                                   |
|-----------------------------------------------------------------------------------|------------|-----------------------------------------------------------------------------|
| <b>Chronic Obstructive Pulmonary Disease and Allied Conditions</b><br>(490–496)   | <b>490</b> | <b>Bronchitis, not specified as acute or chronic</b>                        |
|                                                                                   | 491.X      | Chronic bronchitis                                                          |
|                                                                                   | 492.X      | Emphysema                                                                   |
|                                                                                   | 493.X      | Asthma                                                                      |
|                                                                                   | 494.X      | Bronchiectasis                                                              |
|                                                                                   | <b>496</b> | <b>Chronic airway obstruction, not elsewhere classified</b>                 |
| <b>Other diseases of lung (518.8X)</b>                                            | 518.85     | Respiratory failure requiring long-term mechanical ventilation <sup>a</sup> |
| <b>Nutritional Deficiencies</b><br>(260–268.X)                                    | <b>260</b> | <b>Kwashiorkor</b>                                                          |
|                                                                                   | <b>261</b> | <b>Nutritional marasmus</b>                                                 |
|                                                                                   | <b>262</b> | <b>Other severe protein-calorie malnutrition</b>                            |
|                                                                                   | 263.0      | Malnutrition of moderate degree                                             |
|                                                                                   | 263.2      | Arrested development following protein-calorie malnutrition                 |
|                                                                                   | 263.8      | Other protein-calorie malnutrition                                          |
|                                                                                   | 263.9      | Unspecified protein-calorie malnutrition                                    |
|                                                                                   | 265.X      | Thiamine and niacin deficiency states                                       |
|                                                                                   | 266.X      | Deficiency of B-complex components                                          |
|                                                                                   | 268.X      | Vitamin D deficiency                                                        |
| <b>Other ill-defined and unknown causes of morbidity and mortality</b><br>(799.X) | 799.0X     | Asphyxia and hypoxemia                                                      |
|                                                                                   | 799.1      | Respiratory arrest                                                          |
|                                                                                   | 799.2X     | Nervousness                                                                 |
|                                                                                   | 799.3      | Debility, unspecified                                                       |
|                                                                                   | 799.4      | Cachexia                                                                    |
|                                                                                   | 799.5X     | Signs and symptoms involving cognition                                      |
|                                                                                   | 799.8X     | Other ill-defined conditions                                                |
|                                                                                   | 799.9      | Other unknown and unspecified causes of morbidity and mortality             |

ICD-9-CM, International Classification of Diseases 9<sup>th</sup> Version – Clinical Modification.

<sup>a</sup> Definition: 1) Invasive mechanical ventilation  $\geq 21$  days; 2) Invasive mechanical ventilation followed by non-invasive ventilation, for total  $\geq 21$  days; 3) Invasive mechanical ventilation followed by negative pressure ventilation, for total  $\geq 21$  days; 4) Specific diseases, eg, advanced heart failure, chronic airway diseases, primary neuromuscular diseases, or chronic hypoventilation syndrome, requiring non-invasive ventilation for  $\geq 21$  days.
